# Supplementary material for: Case report: Tracing in parallel the salivary and gut microbiota profiles to assist Larotrectinib anticancer treatment for NTRK fusion–positive glioblastoma
Source: Front Oncol. 2024 Nov 20;14:1458990. doi: 10.3389/fonc.2024.1458990 (PMC11614819; doi:10.3389/fonc.2024.1458990)
Supplement: Supplementary file 2 [file Table1.xlsx]

## Sheet: All species gut microbiota
Species	Before treatment	After treatment	Log2 Fold change
Acetatifactor intestinalis	0	0.000367633	#NUM!
Acetivibrio cellulolyticus	0	0.000154793	#NUM!
Actinomyces graevenitzii	6.16893e-05	8.38461e-05	0.442723
Acutalibacter sp003612555	0.0016785	0.00136734	-0.2958
Acutalibacter sp009936035	3.89617e-05	0	#NUM!
Acutalibacter sp009936055	6.49361e-05	0	#NUM!
Acutalibacter sp910574935	6.81829e-05	0	#NUM!
Acutalibacter sp910574995	8.11701e-05	7.73964e-05	-0.0686831
Acutalibacter timonensis	0.000561153	0.00041923	-0.42065
Agathobacter faecis	0.000171899	0.00043858	1.35128
Agathobacter rectalis	9.09106e-05	0.000199941	1.13705
Agathobaculum butyriciproducens	0.000286998	0.000161242	-0.831809
Agathobaculum sp900291975	3.89617e-05	0	#NUM!
Akkermansia muciniphila	0.000169843	0.0134347	6.30562
Akkermansia sp004167605	0	0.000103195	#NUM!
Alistipes communis	4.22085e-05	0.000561124	3.73271
Alistipes finegoldii	0.000131477	0.000148343	0.174127
Alistipes indistinctus	0	0.000167692	#NUM!
Alistipes onderdonkii	0.0105187	0.00363118	-1.53445
Alistipes pullistercoris	3.24681e-05	0.000193491	2.57517
Alistipes putredinis	0.000376448	0.000109645	-1.77961
Alistipes senegalensis	3.24681e-05	0.000141893	2.12771
Alistipes shahii	0.000198757	0.000135444	-0.553316
Alistipes sp900768045	9.09106e-05	0	#NUM!
Allisonella pneumosintes	0.00130207	0	#NUM!
Alloprevotella sp004558535	9.74042e-05	0.000116095	0.253245
Alloprevotella sp900541335	0.000133119	0	#NUM!
Alloprevotella timonensis	0.000963431	0	#NUM!
An181 sp002160325	8.76638e-05	0	#NUM!
An92 sp018917965	0.000194464	0	#NUM!
An92 sp900199495	0.000360395	9.02958e-05	-1.99685
Anaerobutyricum faecale	0.00133158	0.00242509	0.864897
Anaerobutyricum hallii	0.00101682	0.000412781	-1.30062
Anaerobutyricum soehngenii	3.24681e-05	0	#NUM!
Anaerobutyricum stercoris	6.49361e-05	0.000109645	0.755745
Anaerococcus nagyae	4.87021e-05	0	#NUM!
Anaerococcus obesiensis	0.0364439	0.00132219	-4.78468
Anaerococcus octavius	8.11701e-05	0	#NUM!
Anaerococcus senegalensis	0.00045172	0	#NUM!
Anaerococcus vaginalis	0.0531519	0.00228319	-4.541
Anaerofustis stercorihominis	0.000152725	0.000148343	-0.0420025
Anaeromassilibacillus sp001305115	0.000150651	0.000251538	0.73957
Anaeromassilibacillus stercoravium	6.81829e-05	0.000116095	0.767818
Anaerosporomusa subterranea	0.00109226	0.0010642	-0.0375422
Anaerostipes hadrus	0.0509865	0.017827	-1.51605
Anaerostipes sp001940315	0.000103898	0	#NUM!
Anaerotignum faecicola	0.00683375	0.00381822	-0.839777
Anaerotignum lactatifermentans	4.22085e-05	0	#NUM!
Anaerotignum propionicum	0	0.000174142	#NUM!
Anaerotignum sp910576545	4.54553e-05	0	#NUM!
Anaerotruncus colihominis	0.000139613	0	#NUM!
Anaerotruncus massiliensis	0	0.000128994	#NUM!
Anaerotruncus rubiinfantis	0.000107145	0.000161242	0.589673
Anaerotruncus sp000403395	3.24681e-05	0	#NUM!
Angelakisella massiliensis	0.000107145	0.000270887	1.33813
Avispirillum sp011957885	0.000289956	0.000483727	0.738358
Bacilliculturomica massiliensis	6.81829e-05	0	#NUM!
Bacteroides caccae	0.00259584	0.00147053	-0.819866
Bacteroides cellulosilyticus	0.00194513	0.00227674	0.227103
Bacteroides clarus	0.000373164	0.0011287	1.59678
Bacteroides fragilis	0.000366889	0.00336674	3.19794
Bacteroides nordii	0.000585504	0.000135444	-2.11199
Bacteroides ovatus	0.000444594	0.000232189	-0.937186
Bacteroides sp900552405	0	0.000193491	#NUM!
Bacteroides sp900765785	0.000288207	7.73964e-05	-1.89677
Bacteroides thetaiotaomicron	0.00158404	0.00275402	0.797935
Bacteroides uniformis	0.0154235	0.0102034	-0.596078
Bacteroides xylanisolvens	0.00032062	0	#NUM!
Bariatricus comes	0.00134747	0.000122544	-3.45888
Barnesiella intestinihominis	0.000202004	0.00515331	4.67304
Bifidobacterium adolescentis	0.093007	0.0848845	-0.131838
Bifidobacterium animalis	0	9.02958e-05	#NUM!
Bifidobacterium infantis	4.54553e-05	0	#NUM!
Bifidobacterium longum	0.0721034	0.0143183	-2.3322
Bifidobacterium pseudocatenulatum	5.19489e-05	0.000386982	2.8971
Bilophila wadsworthia	0.00100661	0.0011545	0.197756
Bittarella massiliensis	7.79233e-05	0	#NUM!
Blautia faecis	9.74042e-05	0.000103195	0.08332
Blautia hydrogenotrophica	0.00155748	0.000316035	-2.30106
Blautia luti	5.51957e-05	0	#NUM!
Blautia massiliensis	0.00470585	0.000457929	-3.36126
Blautia obeum	0.000953007	0.000812662	-0.229831
Blautia schinkii	3.89617e-05	0	#NUM!
Blautia sp000285855	0.000204549	0	#NUM!
Blautia sp000436615	9.74042e-05	0	#NUM!
Blautia sp900066205	0.000134561	0.000245089	0.865044
Blautia sp900066335	0.000291417	0.000593372	1.02585
Blautia sp900066355	0.000157451	0	#NUM!
Blautia sp900066505	0.000146232	0.000135444	-0.110564
Blautia sp900120195	0.00490938	0.00299911	-0.711006
Blautia sp900548245	6.16893e-05	0	#NUM!
Blautia wexlerae	0.00394284	0.00257343	-0.615542
Borkfalkia ceftriaxoniphila	0	0.000270887	#NUM!
Bulleidia moorei	0.00085304	0.000225739	-1.91795
Butyribacter intestini	3.89617e-05	0	#NUM!
Butyribacter sp003529475	0.000129114	0	#NUM!
Butyricimonas paravirosa	0.000422606	0.00043213	0.0321531
Butyricimonas virosa	0.00032448	0.000161242	-1.0089
Butyrivibrio crossotus	3.24681e-05	0.000180592	2.47564
BX12 sp014333425	0.000321973	0	#NUM!
BX7 sp014384765	0.000213512	0.00021284	-0.00454919
CAG-127 sp900319515	3.57149e-05	0	#NUM!
CAG-1427 sp900540345	0	0.000122544	#NUM!
CAG-1427 sp900551155	0.000972632	0.00162532	0.740761
CAG-177 sp003538135	0.00533717	0.00610142	0.19307
CAG-217 sp000436335	0.000186366	0	#NUM!
CAG-238 sp900542245	0.00508971	0.00199296	-1.35267
CAG-269 sp003525075	0.00042174	0.000735266	0.80191
CAG-313 sp900539265	4.87021e-05	0	#NUM!
CAG-317 sp000433215	0.00193463	0.0011158	-0.793986
CAG-417 sp902791625	0.000197874	0.000470828	1.25062
CAG-45 sp000438375	0.000223108	0.000148343	-0.588808
CAG-452 sp000434035	0.000466582	0.00546289	3.54946
CAG-793 sp000433915	0.00011849	0.000264438	1.15817
CAG-83 sp000431575	0.000423959	0.00021284	-0.994156
CAG-83 sp001916855	0.00763353	0.00361183	-1.07962
CAG-83 sp900549395	0.00135957	0.000922307	-0.559835
Campylobacter coli	0.000462921	0.000251538	-0.879988
Caproiciproducens galactitolivorans	0.000550366	0.00114805	1.06072
Caproiciproducens sp000752215	9.09106e-05	0.000309586	1.76782
Choladousia sp902363665	0.000174858	0	#NUM!
Christensenella hongkongensis	8.11701e-05	0	#NUM!
Christensenella minuta	8.4417e-05	0.000128994	0.611699
Christensenella sp014287795	0.000256749	0.000257988	0.0069466
Christensenella timonensis	0.000167029	0	#NUM!
Cloacibacillus evryensis	0.00103156	0.0074107	2.84479
Clostridioides difficile	0.00221067	0.00496627	1.16768
Clostridium celatum	0.00550284	0.00854585	0.635049
Clostridium cuniculi	0.0019822	0.00141248	-0.488866
Clostridium disporicum	3.57149e-05	0	#NUM!
Clostridium fessum	4.54553e-05	0	#NUM!
Clostridium innocuum	0.00162799	0.00142538	-0.191745
Clostridium leptum	0.000481499	0.000477278	-0.0127047
Clostridium perfringens	0.00015139	0.00397301	4.71389
Clostridium saudiense	0	0.00416006	#NUM!
Clostridium scindens	0.000483988	0.000199941	-1.2754
Clostridium sp000509125	0.000770986	0.000225739	-1.77205
Clostridium sp000753455	0.000237017	0.000128994	-0.877686
Clostridium sp000821305	0	0.000483727	#NUM!
Clostridium sp015555905	0.00060585	0.000483727	-0.324766
Clostridium sp015667795	0.000265317	0.000290236	0.129512
Clostridium sp015670405	3.89617e-05	0.000135444	1.79757
Clostridium sulfidigenes	6.16893e-05	0.0135186	7.77571
Clostridium symbiosum	0	0.00103195	#NUM!
Collinsella aerofaciens	0.000282993	0.000567573	1.00404
Collinsella sp002232035	0.00028671	0.00181882	2.66534
Collinsella sp003439125	0.000322224	0.000767514	1.25213
Coprobacillus cateniformis	0.00259527	0.00349574	0.429714
Coprobacter fastidiosus	0	0.000187041	#NUM!
Coprobacter secundus	0.000121881	0.00063207	2.37462
Coprococcus catus	0.00302308	0.00063207	-2.25786
Coprococcus sp000154245	0.00024746	8.38461e-05	-1.56138
Coprococcus sp900066115	0.000457274	0	#NUM!
Coprocola sp000364165	0.000245529	0.000232189	-0.0805934
Copromonas sp900066055	0	0.00238639	#NUM!
Copromonas sp900541255	0.0028843	0.000380532	-2.92213
Copromorpha sp900066305	0.00116484	0.00128994	0.147172
Copromorpha sp900545775	0.000155847	9.02958e-05	-0.787397
Copromorpha sp900549125	0.00296315	0.00139313	-1.08879
Coproplasma sp910579585	0	7.09467e-05	#NUM!
Cryptobacteroides sp000431015	4.87021e-05	0.00020639	2.08332
Cryptobacteroides sp000432515	4.87021e-05	0.000135444	1.47564
Cryptobacteroides sp000433355	8.11701e-05	0.000283787	1.80579
Cryptobacteroides sp004554455	0	0.000225739	#NUM!
Cupidesulfovibrio termitidis	0	0.000103195	#NUM!
Dehalobacterium formicoaceticum	0.000844202	0.00250248	1.5677
Desulfovibrio legallii	0.00613977	0.0032313	-0.92607
Dialister hominis	4.22085e-05	0	#NUM!
Dialister invisus	0.00141392	0.00021929	-2.68879
Dialister micraerophilus	0.000100651	0	#NUM!
Dialister sp001553355	0.00305488	0	#NUM!
Dialister sp900538805	5.19489e-05	0	#NUM!
Dialister sp900543165	5.19489e-05	0	#NUM!
Dialister succinatiphilus	0.000103898	0	#NUM!
Dielma fastidiosa	3.89617e-05	0	#NUM!
Dorea formicigenerans	0.00439587	0.00190911	-1.20325
Dorea longicatena	0.0259625	0.0084749	-1.61516
Dorea phocaeensis	0.000144608	0	#NUM!
DTU014 sp900016865	0	0.000154793	#NUM!
Duodenibacillus intestinigallinarum	3.89617e-05	0.000128994	1.72718
Dysosmobacter avistercoris	0.000186654	0.000335384	0.845449
Dysosmobacter sp000403435	5.19489e-05	0	#NUM!
Dysosmobacter sp001916835	0	0.000225739	#NUM!
Dysosmobacter sp018228705	0.00136123	0.00252828	0.893242
Dysosmobacter sp910576865	0.000655855	0	#NUM!
Dysosmobacter welbionis	0.000579462	0.00279272	2.26889
Eggerthella lenta	0.000634169	0.000690118	0.121976
Eggerthella sp014287365	0.000672554	0.000696567	0.0506138
Eggerthella timonensis	4.87021e-05	0	#NUM!
Eisenbergiella porci	5.19489e-05	0	#NUM!
Eisenbergiella tayi	0.0121401	0.00105775	-3.52071
Emergencia sp009936045	0.000217643	0.00020639	-0.0765871
Enterenecus faecium	0.000209093	0.000167692	-0.318331
Enterocloster aldenensis	0.000229007	0.000251538	0.135388
Enterocloster bolteae	0.000914999	0	#NUM!
Enterocloster citroniae	0.00032816	0	#NUM!
Enterocloster clostridioformis	8.11701e-05	0	#NUM!
Enterocloster sp000431375	0	8.38461e-05	#NUM!
Enterocloster sp001517625	4.22085e-05	0	#NUM!
Enterococcus casseliflavus	0.000636425	0.000399881	-0.670418
Enterococcus dispar	4.87021e-05	0	#NUM!
Enterococcus durans	0	0.000522426	#NUM!
Enterococcus faecalis	0.000586495	0.000251538	-1.22134
Enterococcus faecium	0.00249342	0.0157244	2.6568
Enterococcus hirae	0	0.000161242	#NUM!
Enterococcus lactis	0.000271792	0.0151697	5.80255
Enterococcus mundtii	0	9.67455e-05	#NUM!
Enterococcus sp002850555	0.00249395	0.00147053	-0.762092
ER4 sp000765235	0.000265768	0.000161242	-0.720937
ER4 sp900317525	0.00185303	0.000296686	-2.64287
Erysipelatoclostridium ramosum	0.00802608	0	#NUM!
Escherichia coli	0.0215192	0.0225223	0.0657302
Eubacterium sp000436835	5.51957e-05	0	#NUM!
Eubacterium sp003491505	0	0.000109645	#NUM!
Eubacterium sp900066595	0.00128052	0.000503077	-1.34787
Eubacterium sulci	4.54553e-05	0	#NUM!
Evtepia viridis	7.46765e-05	0	#NUM!
Faecalibacillus faecis	0.0254068	0.0100809	-1.33359
Faecalibacillus intestinalis	0.000212647	0.00021929	0.0443771
Faecalibacterium prausnitzii	0.00120082	0.000135444	-3.14826
Faecalimonas phoceensis	0.00357197	0.00493402	0.466042
Fimenecus sp000432435	0.000292608	0	#NUM!
Fimenecus sp004556705	4.54553e-05	0	#NUM!
Fimicola cottocaccae	7.79233e-05	0.000116095	0.575173
Fimisoma sp910588185	5.19489e-05	0.000309586	2.57517
Fimivivens sp014385025	0.000164089	0.000232189	0.50082
Finegoldia magna	0.00291414	0.000135444	-4.4273
Firm-08 sp001604045	4.22085e-05	0	#NUM!
Flavonifractor avistercoris	0.000100651	0.000116095	0.205939
Flavonifractor intestinigallinarum	0.00118766	0.000167692	-2.82423
Flavonifractor plautii	0.000921348	0	#NUM!
Formimonas warabiya	0.000159507	0.000393432	1.30249
Fournierella massiliensis	5.19489e-05	0	#NUM!
Fusicatenibacter saccharivorans	0.0663329	0.178192	1.42564
GCA-900066495 sp014323405	5.84425e-05	0	#NUM!
GCA-900066495 sp900066495	0.000227546	0.000116095	-0.970858
GCA-900066495 sp900545985	0.000788629	0.000761064	-0.051329
GCA-900066495 sp902362365	0.000292213	0.000225739	-0.372359
GCA-900066755 sp902363085	0	7.09467e-05	#NUM!
GCA-900066905 sp900066905	0.00155696	0.011603	2.89769
GCA-900199385 sp017569285	0.0032638	0.00130284	-1.32489
GCA-900199385 sp900176495	0.00101358	0.000793313	-0.353491
GCA-900199385 sp900199385	0.00317025	0.00773319	1.28647
GCA-900199385 sp900322155	0.000634657	0.00042568	-0.576208
Gemella morbillorum	0.00248442	8.38461e-05	-4.88902
Gemella sanguinis	0.00010314	0.000257988	1.32271
Gemmiger formicilis	0.00057488	0	#NUM!
Gemmiger qucibialis	0.000303376	0.000154793	-0.97077
Granulicatella adiacens	0.000167624	0	#NUM!
HGM11507 sp900761005	5.51957e-05	0	#NUM!
HGM12619 sp015067305	0	0.00247668	#NUM!
Hungateiclostridium mesophilum	0	0.000238639	#NUM!
Hungatella effluvii	0.00170667	0.00323775	0.923803
Hungatella hathewayi	0.00022796	0.000354733	0.637954
Hungatella sp005845265	0.000477494	0.00150923	1.66026
Hydrogeniiclostridium mannosilyticum	0.000156261	0.000174142	0.156309
Intestinibacter bartlettii	0.000312665	0.000902958	1.53004
Intestinibacter sp900540355	3.57149e-05	0.00152858	5.41952
Intestinimonas butyriciproducens	0.00135148	9.02958e-05	-3.90373
Intestinimonas massiliensis	0.000269141	0.00128994	2.26087
Intestinimonas merdavium	0.000100632	0.000161242	0.680138
Intestinimonas timonensis	9.59063e-05	0.000103195	0.105678
ISDg sp902797475	0.000237124	0.000199941	-0.246068
JAAXUU01 sp013335845	0.000612795	0.000554674	-0.143764
JAGZMM01 sp018364155	6.81829e-05	0.000122544	0.845821
Lachnoclostridium sp003464085	4.54553e-05	0	#NUM!
Lachnoclostridium sp900066555	0.000101372	0	#NUM!
Lachnospira eligens	0.000187845	0.000232189	0.305759
Lachnospira rogosae	0.000987312	0.000399881	-1.30393
Lachnospira sp000437735	4.54553e-05	9.67455e-05	1.08975
Lachnospira sp003451515	9.75297e-05	0.000128994	0.40339
Lacticaseibacillus paracasei	0.000984661	0.00152858	0.634492
Lacticaseibacillus rhamnosus	0.000355758	0.000225739	-0.656236
Lactobacillus delbrueckii	0.000364182	0.000599822	0.719876
Lactobacillus gasseri	0.000195818	0	#NUM!
Lactococcus cremoris	0.000176481	0.000238639	0.435316
Lactococcus lactis	0.000249678	0.000367633	0.558195
Lactococcus petauri	0.000107145	0	#NUM!
Lactococcus plantarum	0.000142859	0.00020639	0.530779
Lactococcus raffinolactis	0.000272118	0.000348284	0.356033
Latilactobacillus sakei	5.84425e-05	0	#NUM!
Lawsonella clevelandensis	8.11701e-05	0	#NUM!
Lawsonibacter asaccharolyticus	0.000356209	0	#NUM!
Lawsonibacter pullicola	0.00199881	0.000490177	-2.02777
Lawsonibacter sp000177015	0.0015424	0.000367633	-2.06884
Lawsonibacter sp000492175	5.51957e-05	0	#NUM!
Lawsonibacter sp002161175	6.81829e-05	0	#NUM!
Lawsonibacter sp003478995	0.000321522	0.000122544	-1.39161
Lawsonibacter sp009917615	5.19489e-05	0.000322485	2.63407
Lawsonibacter sp900066645	0.000494649	0.000316035	-0.646321
Lawsonibacter sp900545895	0.000378937	0.000122544	-1.62865
Leuconostoc carnosum	7.14297e-05	0	#NUM!
Leuconostoc lactis	0	7.09467e-05	#NUM!
Levyella massiliensis	3.89617e-05	0	#NUM!
Ligilactobacillus animalis	0	0.000167692	#NUM!
Limadaptatus stercorigallinarum	0	0.000257988	#NUM!
Limivicinus sp002320035	0.00471852	0.00892638	0.91974
Limivivens sp900543575	0.000311349	0.000193491	-0.686266
Limosilactobacillus fermentum	0.000127635	0.000193491	0.600245
Mailhella massiliensis	0	0.000109645	#NUM!
Marseille-P2935 sp900104565	8.11701e-05	0	#NUM!
MARSEILLE-P3954 sp900604345	0.00012262	9.02958e-05	-0.441468
Marvinbryantia sp900066075	0.000160391	0	#NUM!
Massilimaliae massiliensis	0.000222225	0.000135444	-0.714326
Massilimaliae timonensis	3.89617e-05	6.4497e-05	0.727176
Massilioclostridium coli	7.14297e-05	0	#NUM!
Massilioclostridium methylpentosum	0	0.000122544	#NUM!
Massiliomicrobiota merdigallinarum	0	0.000180592	#NUM!
Massilistercora timonensis	0.0158737	0.00578538	-1.45616
Mediterraneibacter butyricigenes	0.000591565	0.000309586	-0.934199
Mediterraneibacter caccavium	4.54553e-05	0	#NUM!
Mediterraneibacter faecis	0.00577921	0.0011029	-2.38957
Mediterraneibacter lactaris	0.000126625	0	#NUM!
Mediterraneibacter massiliensis	4.22085e-05	0.000116095	1.4597
Mediterraneibacter sp900120155	6.81829e-05	0	#NUM!
Mediterraneibacter torques	0.027918	0.0115772	-1.26991
Merdibacter massiliensis	0.00186351	0.000283787	-2.71515
Merdibacter merdipullorum	0.000134128	0	#NUM!
Merdicola sp001915925	0.000323164	0.000380532	0.235752
Merdicola sp900552655	0.0166591	0.0517911	1.63639
Merdimonas massiliensis	0.000123379	0	#NUM!
Merdisoma sp002160825	0.000218834	0.000103195	-1.08446
Merdousia sp001917305	0	0.000180592	#NUM!
Mogibacterium diversum	0.000116127	0.000270887	1.22199
Monoglobus pectinilyticus	0	0.000232189	#NUM!
Muricomes fissicatena	0.000299553	0	#NUM!
Muricomes sp000509105	0.000198613	0	#NUM!
Negativibacillus massiliensis	0.000566042	0.000135444	-2.06322
NSJ-32 sp014384895	0.000114648	0.000128994	0.170098
NSJ-40 sp014384705	0.000391328	0.000193491	-1.01611
NSJ-50 sp014385105	0	0.000193491	#NUM!
NSJ-51 sp900549795	0.000135156	0.000109645	-0.301791
NSJ-53 sp014384795	0.000396343	0.0121125	4.93361
NSJ-62 sp014334055	8.11701e-05	0	#NUM!
NSJ-63 sp014384805	0.00648929	0.00230254	-1.49483
Odoribacter splanchnicus	0.000610143	0.00137379	1.17094
Olegusella sp000466405	7.14297e-05	8.38461e-05	0.231219
Oliverpabstia intestinalis	0.000468656	0	#NUM!
Onthenecus sp900199405	0.00434258	0.0095907	1.14308
Oxalobacter formigenes	6.81829e-05	0	#NUM!
Papillibacter cinnamivorans	0.000212628	0.000187041	-0.184978
Parabacteroides distasonis	0.00238829	0.00283787	0.248829
Parabacteroides gordonii	0.00320348	0.0031797	-0.0107484
Parabacteroides johnsonii	0.000352818	0.000354733	0.00781166
Parabacteroides merdae	0.00135546	0.00259278	0.935715
Paraclostridium sordellii	9.74042e-05	0.000457929	2.23307
Paraclostridium tenue	0.000227276	0.000148343	-0.61551
Paralachnospira sp014337195	5.51957e-05	0.000141893	1.36218
Paraprevotella sp900760455	0.000527224	0.000457929	-0.203294
Pararuminococcus sp014385095	4.87021e-05	0	#NUM!
Parvimonas sp001553085	0.00169295	0.000116095	-3.86617
Pauljensenia sp000185285	4.22085e-05	0	#NUM!
Pauljensenia sp000411415	0.00020406	0.000116095	-0.813694
Pauljensenia sp000466265	5.19489e-05	0.000148343	1.51377
Pauljensenia sp001072465	0.000139613	0.000135444	-0.0437367
Pelethomonas sp014237695	0.000541221	0.00354088	2.70982
Pelotomaculum thermopropionicum	0	0.00021929	#NUM!
Peptoniphilus faecalis	0.000566242	0	#NUM!
Peptoniphilus gorbachii	0.0118729	0.000116095	-6.67623
Peptoniphilus harei	0.00353642	0	#NUM!
Peptoniphilus lacrimalis	0.00701732	7.73964e-05	-6.50251
Peptoniphilus lacydonensis	0.00124677	0	#NUM!
Peptoniphilus pacaensis	6.16893e-05	0	#NUM!
Peptoniphilus phoceensis	0.000113638	0	#NUM!
Peptoniphilus senegalensis	0.000764981	0	#NUM!
Peptoniphilus sp018919265	5.84425e-05	0	#NUM!
Peptoniphilus sp900343085	0.000444431	0	#NUM!
Peptoniphilus sp902363535	0.000113638	0	#NUM!
Peptoniphilus timonensis	0.000233012	0	#NUM!
Peptoniphilus vaginalis	6.81829e-05	0	#NUM!
Petroclostridium xylanilyticum	8.11701e-05	0.000193491	1.25325
Phocaeicola coprophilus	3.24681e-05	0	#NUM!
Phocaeicola dorei	0.00537775	0.00608207	0.17756
Phocaeicola plebeius	0.000107145	0.00167047	3.96262
Phocaeicola sp900546645	0.000414507	0	#NUM!
Phocaeicola vulgatus	0.0113807	0.00357313	-1.67133
Phocea massiliensis	0.000227672	0	#NUM!
Porphyromonas asaccharolytica	0.000845932	0	#NUM!
Porphyromonas somerae	0.00823954	0	#NUM!
Prevotella brunnea	0.000107145	0	#NUM!
Prevotella buccalis	7.79233e-05	0	#NUM!
Prevotella corporis	0.000537704	0	#NUM!
Prevotella sp000479005	0.000385411	0	#NUM!
Prevotella sp016286585	0.000678345	0.000625621	-0.116731
Prevotella sp900546575	4.87021e-05	0	#NUM!
Pseudobacteroides cellulosolvens	0	0.000277337	#NUM!
Pseudobutyricicoccus sp003477405	6.81829e-05	8.38461e-05	0.298333
Pseudoflavonifractor sp014287675	5.19489e-05	0	#NUM!
Pseudomonas aeruginosa	0	0.00020639	#NUM!
Pseudoruminococcus massiliensis	4.22085e-05	0.00386982	6.51859
Pygmaiobacter sp014287275	0.000160987	0	#NUM!
QALA01 sp003343565	0	0.000180592	#NUM!
QALW01 sp900552055	0	0.000148343	#NUM!
QANA01 sp017439085	7.14297e-05	0	#NUM!
QANG01 sp003150145	0.000220006	0.000309586	0.492796
Raoultibacter sp901411515	0.000201409	0.000161242	-0.320895
RGIG6353 sp015065265	4.22085e-05	0.000270887	2.68209
RGIG9151 sp016287855	7.14297e-05	0	#NUM!
Rikenella microfusus	9.81251e-05	0.00142538	3.86058
Romboutsia hominis	0.00120193	0.000722366	-0.734547
Romboutsia ilealis	0.00433761	0.00586278	0.434683
Romboutsia lituseburensis	6.49361e-05	0.000109645	0.755745
Romboutsia sp000686145	8.76638e-05	0.000174142	0.990211
Romboutsia sp018336475	0.0131272	0.0276047	1.07235
Romboutsia timonensis	0.0395431	0.105988	1.4224
Roseburia hominis	0.000444738	0.00021284	-1.06319
Rothia mucilaginosa	0.00033644	0.000199941	-0.750776
RUG115 sp900066395	0	8.38461e-05	#NUM!
RUG13077 sp902785485	0	0.000199941	#NUM!
RUG472 sp902768995	0.0314781	0.0410717	0.383796
Ruminiclostridium siraeum	0.000165587	0.000154793	-0.0972522
Ruminococcus bicirculans	0.00117496	0.000825561	-0.509167
Ruminococcus bromii	0.0242736	0.0189428	-0.357743
Ruminococcus gauvreauii	0.000249083	0.000748165	1.58673
Ruminococcus gnavus	0.000178574	0	#NUM!
Ruminococcus sp000433635	0.000175453	0	#NUM!
Ruminococcus sp003438075	9.74042e-05	0	#NUM!
Ruminococcus sp003526955	3.57149e-05	0	#NUM!
Ruminococcus sp905233145	3.89617e-05	0	#NUM!
Ruthenibacterium lactatiformans	0.00226886	0.00828141	1.86791
S5-A14a sp000758905	0.000423941	0	#NUM!
Salmonella enterica	7.79233e-05	0.000251538	1.69065
Scatavimonas merdipullorum	0	0.00183816	#NUM!
Scatocola faecipullorum	0	0.00136734	#NUM!
Scatomonas sp003481995	0.000334816	0.000328935	-0.0255686
Scatousia sp000431315	7.14297e-05	7.09467e-05	-0.00978938
Sedimentibacter hydroxybenzoicus	0	7.73964e-05	#NUM!
SFEB01 sp004558105	0	0.000296686	#NUM!
Soleaferrea massiliensis	4.54553e-05	8.38461e-05	0.883295
Solibaculum mannosilyticum	0.000122909	0.000148343	0.27135
Sporobacter termitidis	0.00184694	0.00110935	-0.735424
Spyradocola merdavium	0.000196846	0.000128994	-0.609761
Staphylococcus epidermidis	0.000146106	0	#NUM!
Staphylococcus haemolyticus	8.4417e-05	0	#NUM!
Streptococcus australis	0.000259744	0	#NUM!
Streptococcus constellatus	0.00024185	0.000445029	0.879789
Streptococcus equinus	0.000100651	0	#NUM!
Streptococcus gordonii	0	7.09467e-05	#NUM!
Streptococcus infantarius	0.00153734	0.00133509	-0.203501
Streptococcus koreensis	7.79233e-05	0	#NUM!
Streptococcus lutetiensis	0.00278206	0.0021671	-0.360391
Streptococcus macedonicus	0	0.000251538	#NUM!
Streptococcus mitis	6.49361e-05	0	#NUM!
Streptococcus oralis	0.000283463	0.00021929	-0.370321
Streptococcus parasanguinis	0.00156991	0.00041923	-1.90487
Streptococcus pneumoniae	0.000107145	0	#NUM!
Streptococcus pseudopneumoniae	9.09106e-05	0	#NUM!
Streptococcus rubneri	5.84425e-05	0	#NUM!
Streptococcus salivarius	8.4417e-05	0.000174142	1.04466
Streptococcus sanguinis	5.84425e-05	0.000109645	0.907748
Streptococcus sp000314795	0.000357149	0	#NUM!
Streptococcus sp001556435	0	8.38461e-05	#NUM!
Streptococcus sp001813295	0.000443459	0.000303136	-0.548835
Streptococcus sp004166885	0.00238545	0.000767514	-1.636
Streptococcus sp900766505	0.00515934	0.00142538	-1.85584
Streptococcus sp902363395	0.000237431	7.09467e-05	-1.7427
Streptococcus sp903645285	0	0.000187041	#NUM!
Streptococcus thermophilus	0.00786857	0.0114998	0.547436
Streptococcus vestibularis	9.09106e-05	0.000167692	0.883295
Streptococcus xiaochunlingii	0.00299679	0.000709467	-2.07861
Syntrophomonas zehnderi	0	0.000303136	#NUM!
Terrisporobacter glycolicus	0.000387179	0	#NUM!
Terrisporobacter othiniensis	0.000110391	0.00020639	0.902748
Tidjanibacter inops	0.00246253	0.000754615	-1.70633
Traorella massiliensis	0.00015287	0	#NUM!
Turicibacter sanguinis	3.24681e-05	0.000354733	3.44964
Turicibacter sp001543345	0.00595241	0.00796538	0.42027
UBA10677 sp003533505	0	7.09467e-05	#NUM!
UBA11524 sp900769075	0.000192264	0.000109645	-0.810249
UBA1206 sp002310055	0.000432797	0.00137379	1.66639
UBA1394 sp900066845	0.000362251	0.00234124	2.69221
UBA1417 sp003531055	0.0012529	0.000541775	-1.20951
UBA2658 sp002841545	0.000847374	0.000786863	-0.106886
UBA3792 sp902768795	0.000110391	0.000122544	0.150675
UBA5905 sp002437905	0.00019138	0.000503077	1.39434
UBA6256 sp014360195	0	0.000483727	#NUM!
UBA9506 sp003506415	0	0.000593372	#NUM!
UMGS1326 sp014982785	0.000351627	0.000445029	0.339854
UMGS692 sp900544545	7.14297e-05	0.00043858	2.61824
UMGS882 sp905235695	0.000200976	0.00150923	2.90872
Veillonella parvula	0	8.38461e-05	#NUM!
Ventrisoma faecale	0.000171015	0.000154793	-0.143788
Victivallis vadensis	0	0.000503077	#NUM!
WRMS01 sp018434325	0	0.000116095	#NUM!

## Sheet: All species salivary microbiota
Species	Before treatment	After treatment	Log2 Fold change
Abiotrophia defectiva	0.0030538	0.000556299	-2.45668
Acholeplasma axanthum	0.000152242	0	#NUM!
Actinomyces massiliensis	0	0.000360843	#NUM!
Actinomyces naeslundii	0.000134332	0	#NUM!
Actinomyces oris	0.000877633	0.000977282	0.155157
Actinomyces sp000195595	0.000179109	0.000872036	2.28355
Actinomyces sp001278845	0.000385084	0.0011126	1.53069
Allisonella pneumosintes	0.000170153	0.000932177	2.45377
Alloprevotella rava	0.000689569	0	#NUM!
Alloprevotella sp900095835	0.000223886	0	#NUM!
Alloprevotella tannerae	0.000116421	0	#NUM!
Alloscardovia omnicolens	8.95544e-05	0	#NUM!
Aminipila butyrica	0.000492549	0	#NUM!
Aminipila sp004103735	0.0020508	0.000330772	-2.63227
Aminipila terrae	0.00349262	0.00064651	-2.43357
Anaeroglobus geminatus	0	0.000526229	#NUM!
Anaeroglobus micronuciformis	0	0.000466088	#NUM!
Anaerovibrio sp900548165	0.00607179	0.00300702	-1.01379
Bacteroides heparinolyticus	0.0373263	0.00118777	-4.97386
BAD-6 sp018128545	0.0025523	0.000210491	-3.59996
Bifidobacterium longum	0.000376128	0.00154862	2.04168
Bulleidia extructa	0.00220304	0.000225527	-3.28812
Bulleidia moorei	0.0042001	0.00425494	0.0187134
Bulleidia timonensis	0.00275827	0.000691615	-1.99573
Butyrivibrio sp900116875	0.000573148	0	#NUM!
BX12 sp014333425	0.000205975	0	#NUM!
BX12 sp902363595	0.0131734	0.000180421	-6.19012
BX12 sp910575405	0.00147765	0.000360843	-2.03386
CAG-238 sp900542245	0.000107465	0	#NUM!
CAG-269 sp003525075	0	0.000210491	#NUM!
CAG-313 sp000433035	9.85098e-05	0.000390913	1.98851
CAG-313 sp003539625	0.0015672	0	#NUM!
CAG-313 sp900539265	0.00549864	0	#NUM!
CAG-791 sp900625025	0.00296425	0	#NUM!
CAG-793 sp000433915	9.85098e-05	0.00109756	3.47789
CAJPSE01 sp003860125	0.000223886	0	#NUM!
Campylobacter concisus	0.000367173	0.00396927	3.43434
Campylobacter curvus	0.000385084	0	#NUM!
Campylobacter gracilis	9.85098e-05	0.00218009	4.46798
Campylobacter rectus	0.000188064	0.000541264	1.52511
Campylobacter showae	0	0.000992317	#NUM!
Capnocytophaga endodontalis	0.000125376	0.000360843	1.52511
Capnocytophaga gingivalis	0.00117316	0.000616439	-0.928372
Capnocytophaga granulosa	0.000850767	0.00067658	-0.330503
Capnocytophaga leadbetteri	0.00190751	0.000962247	-0.98721
Capnocytophaga ochracea	0.000125376	0.00187939	3.90593
Capnocytophaga sputigena	0	0.000165386	#NUM!
Cardiobacterium hominis	0.000573148	0.000270632	-1.08258
Catonella massiliensis	0.00167467	0.0124491	2.89409
Catonella morbi	0.00553446	0.00211995	-1.38441
Centipeda felix	0.000788079	0.00127798	0.697459
Centipeda infelix	0.000402995	0	#NUM!
Centipeda noxia	0.000143287	0.00771301	5.75031
Centipeda sp000318175	0.000716435	0.000390913	-0.873989
Centipeda sp001717585	0.00171944	0.00129302	-0.411198
Clostridium perfringens	0.00134332	0.000857001	-0.648429
Copromorpha sp900066305	0.000528371	0	#NUM!
Copromorpha sp900549125	0.023723	0.000300702	-6.3018
Corynebacterium durum	0.000385084	0.000420983	0.128589
Cryptobacteroides sp000435075	0.000170153	0	#NUM!
Cryptobacteroides sp002438805	0.000179109	0	#NUM!
Cryptobacteroides sp004554455	0.00244483	0.000210491	-3.5379
Cryptobacteroides sp900317065	0.000170153	0	#NUM!
Cryptobacteroides sp900546925	0.000134332	0	#NUM!
Cryptobacteroides sp902789245	0.0112212	0.000917142	-3.61293
Cryptobacteroides sp902792815	0.000644792	0	#NUM!
Desulfovibrio sp000403945	0.00347471	0.000225527	-3.94552
Dialister invisus	0	0.00195456	#NUM!
DUQW01 sp012515785	0.000161198	0	#NUM!
Eggerthia catenaformis	0.054261	0.000511194	-6.7299
Eikenella corrodens	0.000107465	0.000571334	2.41046
Emergencia sp009936045	0.00139705	0	#NUM!
Emergencia sp900066695	0.000152242	0	#NUM!
Enterobacter hormaechei	0.00317918	0.000811896	-1.96929
Eubacterium infirmum	0.000626881	0.00195456	1.64058
Eubacterium pullicola	0.000205975	0	#NUM!
Eubacterium saphenum	0.0295261	0.00765287	-1.94792
Eubacterium sulci	0	0.000270632	#NUM!
F0058 sp000163695	0.00163885	0.00204477	0.319262
F0422 sp003992315	0	0.000330772	#NUM!
F0422 sp003999875	0	0.000511194	#NUM!
Fannyhessea vaginae	0.000165386	0	#NUM!
Filifactor alocis	0.00529266	0	#NUM!
Fimenecus sp004556705	0.000152242	0	#NUM!
Fusobacterium animalis	0.0011463	0.00318744	1.47542
Fusobacterium nucleatum	0	0.000300702	#NUM!
Fusobacterium polymorphum	0.000250752	0.00215002	3.10002
Fusobacterium pseudoperiodonticum	0	0.000150351	#NUM!
Fusobacterium vincentii	0.0677121	0.0044955	-3.91286
Gemella haemolysans	0.0159049	0.00306716	-2.37449
Gemella morbillorum	0.0180004	0.00399934	-2.1702
Gemella sanguinis	0.00977038	0.0147795	0.597111
Granulicatella adiacens	0.0027135	0.00285667	0.0741809
Granulicatella sp001058355	0.000107465	0	#NUM!
Granulicatella sp001071995	0.000573148	0.000195456	-1.55206
Haemophilus parainfluenzae	0.000501505	0.00160876	1.68161
Haemophilus sp001815355	0.000152242	0.000947212	2.63732
Haemophilus sp905215245	0.000223886	0.00109756	2.29347
IOR16 sp017168145	0.00303589	0.000405948	-2.90275
JABCPE02 sp013333255	9.85098e-05	0	#NUM!
Johnsonella sp900766185	0	0.000180421	#NUM!
Lachnoanaerobaculum gingivalis	0.000210491	0	#NUM!
Lachnoanaerobaculum orale	0.000631474	0	#NUM!
Lachnoanaerobaculum sp000296385	0.000165386	0	#NUM!
Lancefieldella parvula	0.000902106	0	#NUM!
Lancefieldella rimae	0.000367173	0.000902106	1.29684
Lancefieldella sp000411555	0.000752257	0.000210491	-1.83746
Lancefieldella sp000564995	0.000528371	0.00199967	1.92014
Lawsonella clevelandensis	0.000143287	0	#NUM!
Leptotrichia sp000469505	0.000483594	0.00159372	1.72053
Limadaptatus stercorigallinarum	0.00183586	0.00159372	-0.20406
Merdicola sp900552655	0	0.00317241	#NUM!
Metamycoplasma orale	0.000367173	0.00261611	2.83289
Metamycoplasma salivarium	0	0.000315737	#NUM!
Mitsuokella sp003458855	0.000340307	0	#NUM!
Mogibacterium diversum	0.00480011	0.00784833	0.709316
Mogibacterium timidum	0.0626433	0.00332276	-4.23671
Nanoperiomorbus sp905372225	0	0.000240562	#NUM!
Nanosynbacter sp905370345	0.000402995	0.00114267	1.50357
Nanosyncoccus sp007845165	0	0.000240562	#NUM!
Nanosyncoccus sp013332965	0	0.00109756	#NUM!
Neisseria sp000186165	0	0.000255597	#NUM!
Olsenella sp001189515	0	0.000541264	#NUM!
Olsenella uli	0.000286574	0	#NUM!
Oribacterium asaccharolyticum	0	0.00360843	#NUM!
Oribacterium parvum	0.000420906	0.0219813	5.70664
Oribacterium sp000160135	9.85098e-05	0.000917142	3.2188
Oribacterium sp013394775	0.000698524	0	#NUM!
Parvimonas micra	0.0141675	0.0233195	0.718948
Parvimonas sp000214475	0.00102988	0.000601404	-0.776063
Parvimonas sp000223315	0.00161198	0.000496159	-1.69996
Pauljensenia sp000185285	0.000743301	0.000691615	-0.103978
Pauljensenia sp000308055	0.000259708	0.000270632	0.0594433
Pauljensenia sp000411415	0.000886588	0.00129302	0.544407
Pauljensenia sp000466265	0.000367173	0.00180421	2.29684
Pauljensenia sp000758755	0	0.000345807	#NUM!
Pauljensenia sp001072465	0.000850767	0.00145841	0.777557
Pectinatus frisingensis	0.00041195	0.0020147	2.29003
Peptidiphaga gingivicola	0	0.000150351	#NUM!
Peptidiphaga sp000466165	0	0.000315737	#NUM!
Peptoanaerobacter yurii	0	0.000721685	#NUM!
Peptoniphilus lacrimalis	0.00070748	0.000195456	-1.85584
Peptostreptococcus anaerobius	0.00122689	0.00106749	-0.200786
Peptostreptococcus sp000758885	0.00631358	0.00472102	-0.419359
Peptostreptococcus stomatis	0.000716435	0.000285667	-1.3265
PHAE01 sp002840285	0.00031344	0	#NUM!
Phocaeicola abscessus	0.00595537	0.000496159	-3.58532
Porphyromonas endodontalis	0.0388487	0.00566824	-2.77689
Porphyromonas gingivalis	0.00958232	0.000345807	-4.79233
Porphyromonas sp000467855	0.00176422	0.000390913	-2.17411
Porphyromonas sp018127745	0.000564193	0.000345807	-0.706219
Prevotella albensis	0.000214931	0	#NUM!
Prevotella baroniae	0.00841811	0.00076679	-3.45659
Prevotella buccae	0.00177318	0	#NUM!
Prevotella conceptionensis	0	0.000255597	#NUM!
Prevotella copri	0.00252543	0.00183428	-0.461315
Prevotella denticola	0	0.000240562	#NUM!
Prevotella enoeca	0.0015672	0.00157869	0.0105337
Prevotella histicola	0.000385084	0.00353325	3.19775
Prevotella jejuni	0.000385084	0.00189442	2.29851
Prevotella koreensis	0.000671658	0	#NUM!
Prevotella maculosa	0	0.000405948	#NUM!
Prevotella melaninogenica	0.00214931	0.00735217	1.7743
Prevotella multiformis	0	0.000270632	#NUM!
Prevotella nanceiensis	0.00019702	0	#NUM!
Prevotella nigrescens	0.000304485	0.000390913	0.360476
Prevotella oralis	0.000232841	0	#NUM!
Prevotella oris	0.0547177	0.00287171	-4.25203
Prevotella oulorum	0	0.000180421	#NUM!
Prevotella pallens	0.000188064	0.00076679	2.02761
Prevotella paludivivens	0.00586581	0	#NUM!
Prevotella ruminicola	0.00152242	0.00207484	0.446633
Prevotella salivae	0.000214931	0.000405948	0.917424
Prevotella sp000163055	0.0008239	0	#NUM!
Prevotella sp000257925	0	0.000165386	#NUM!
Prevotella sp000479005	0.000232841	0	#NUM!
Prevotella sp001553265	0.000770168	0	#NUM!
Prevotella sp003043925	0.000295529	0	#NUM!
Prevotella sp003043945	0.000286574	0.000255597	-0.165038
Prevotella sp015074785	0.000116421	0	#NUM!
Prevotella sp016901395	0.00471952	0.00064651	-2.8679
Prevotella sp017347605	0.00308067	0.000375878	-3.03491
Prevotella sp900290275	0.000456727	0	#NUM!
Prevotella veroralis	0.000402995	0.00216506	2.42557
Pseudoramibacter fermentans	0.0258633	0.000165386	-7.28892
Pseudoramibacter porci	0.00216722	0	#NUM!
Pyramidobacter piscolens	0.000814945	0	#NUM!
Pyramidobacter sp002007215	0.00269559	0	#NUM!
Rothia dentocariosa	0.00126272	0.000360843	-1.80709
Rothia mucilaginosa	0.0193617	0.00930673	-1.05686
RUG11257 sp016290415	0.00257917	0.000390913	-2.72199
S5-A14a sp000758905	0.000223886	0	#NUM!
S5-A14a sp900112915	0.00109256	0.000436018	-1.32526
Saccharimonas sp013333795	0.000367173	0.00210491	2.51923
Saccharimonas sp018127705	0	0.000255597	#NUM!
Saccharimonas sp905373835	0.000349262	0.000601404	0.784025
Scardovia wiggsiae	0.000268663	0	#NUM!
Selenomonas sputigena	0.00830169	0.00204477	-2.02146
Shuttleworthia satelles	0.000250752	0.00126295	2.33246
Stomatobaculum longum	0.000250752	0.00121784	2.27999
Stomatobaculum naviforme	0.000188064	0	#NUM!
Streptococcus anginosus	0.00372546	0.00835952	1.166
Streptococcus australis	0.000286574	0.000917142	1.67824
Streptococcus constellatus	0.0777242	0.0776263	-0.00181995
Streptococcus cristatus	0.00889275	0.198463	4.4801
Streptococcus dentisani	0	0.000751755	#NUM!
Streptococcus gordonii	0.016487	0.0363549	1.14082
Streptococcus infantis	0.0852737	0.0396325	-1.10541
Streptococcus intermedius	0.000447772	0	#NUM!
Streptococcus koreensis	0.000886588	0.00181925	1.03701
Streptococcus mitis	0.0115346	0.0223422	0.953801
Streptococcus oralis	0.0201139	0.0184631	-0.123548
Streptococcus parasanguinis	0.00479116	0.045406	3.24444
Streptococcus pneumoniae	0.00555237	0.00225527	-1.29981
Streptococcus pseudopneumoniae	0.0195855	0.0247027	0.334879
Streptococcus salivarius	0	0.0202222	#NUM!
Streptococcus sanguinis	0.00207766	0.00596894	1.52251
Streptococcus sinensis	0.000170153	0.000947212	2.47685
Streptococcus sp000220065	0.000179109	0.000360843	1.01053
Streptococcus sp000235485	0.000662702	0.00869029	3.71297
Streptococcus sp000259505	0.000268663	0.00162379	2.5955
Streptococcus sp000314795	0	0.000195456	#NUM!
Streptococcus sp000411475	0.000474638	0.000390913	-0.279981
Streptococcus sp001553685	0.000340307	0.000436018	0.357553
Streptococcus sp001556435	0	0.0400235	#NUM!
Streptococcus sp001813295	0.00198811	0.0136819	2.78281
Streptococcus sp004166885	0.0169347	0.0258002	0.607399
Streptococcus sp012843315	0.000268663	0.000541264	1.01053
Streptococcus sp013276505	0	0.000195456	#NUM!
Streptococcus sp013394695	0.00116421	0.000315737	-1.88255
Streptococcus sp900766505	0.00652851	0.0559306	3.09881
Streptococcus sp901875575	0.00102988	0.00414969	2.01053
Streptococcus sp905221125	0.00019702	0	#NUM!
Streptococcus sp905221215	0.000295529	0.000345807	0.226667
Streptococcus sp905221295	0.000402995	0.00192449	2.25565
Streptococcus sp905221335	0.000223886	0.000240562	0.103643
Streptococcus sp905221355	0.000698524	0.000360843	-0.95294
Streptococcus sp905221455	0.000420906	0.000315737	-0.414772
Streptococcus symci	0.00351949	0	#NUM!
Streptococcus timonensis	0.000223886	0.000240562	0.103643
Streptococcus vestibularis	0.00100301	0.0413315	5.36484
Streptococcus xiaochunlingii	0.00209557	0.00523222	1.32008
Tannerella forsythia	0	0.000225527	#NUM!
Tannerella sp002890585	0	0.000270632	#NUM!
Tannerella sp003033925	0.000349262	0.00123288	1.81965
Treponema denticola	0.000734346	0.00204477	1.47741
Treponema lecithinolyticum	0	0.000180421	#NUM!
Treponema maltophilum	0.00402995	0.000601404	-2.74435
Treponema medium	0.000116421	0.000496159	2.09145
Treponema parvum	0.0008239	0	#NUM!
Treponema pectinovorum	0.000107465	0	#NUM!
Treponema socranskii	0.000161198	0	#NUM!
Treponema sp014334325	0.000832856	0.000631474	-0.399342
Treponema sp014334335	0.000537326	0.00070665	0.395198
Treponema sp018336815	0.000349262	0.000977282	1.48446
Treponema vincentii	0.000582103	0	#NUM!
UBA4285 sp902775895	0.00129854	0.000466088	-1.47821
UBA9732 sp902781545	0.00229259	0.000225527	-3.34561
Varibaculum timonense	0	0.000210491	#NUM!
Veillonella atypica	0	0.00180421	#NUM!
Veillonella nakazawae	9.85098e-05	0.0073221	6.21585
Veillonella parvula	0.000501505	0.00664552	3.72805
Veillonella rogosae	0	0.00145841	#NUM!
Veillonella tobetsuensis	0	0.00105246	#NUM!
W11650 sp002999035	0	0.000661545	#NUM!
